# Supplementary material for: Ocean warming combined with lower omega-3 nutritional availability impairs the cardio-respiratory function of a marine fish
Source: Oxford University Press journal article supplement (doi:10.1242/jeb.187179), 2019-01-01
Supplement: jeb187179supp.pdf [file jeb187179supp.pdf]

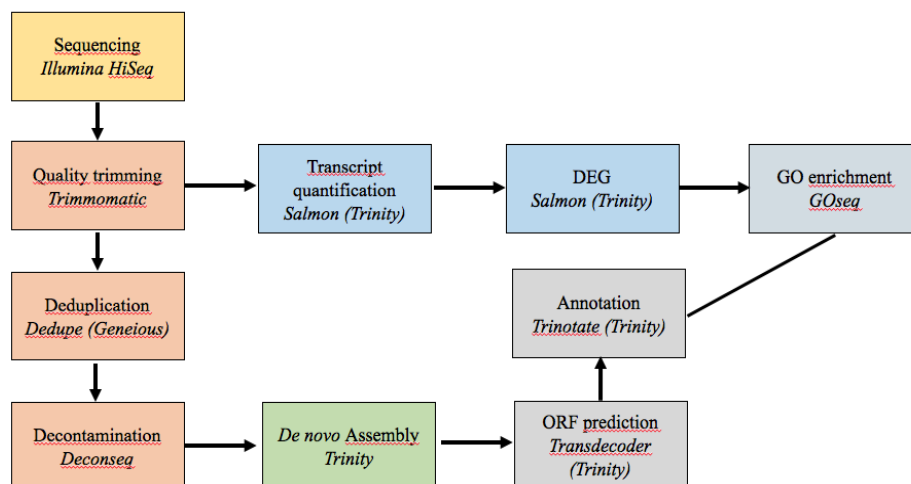

**Figure S1. Transcriptomic analysis pipeline.** This figure describes the steps performed in the transcriptomic analysis.

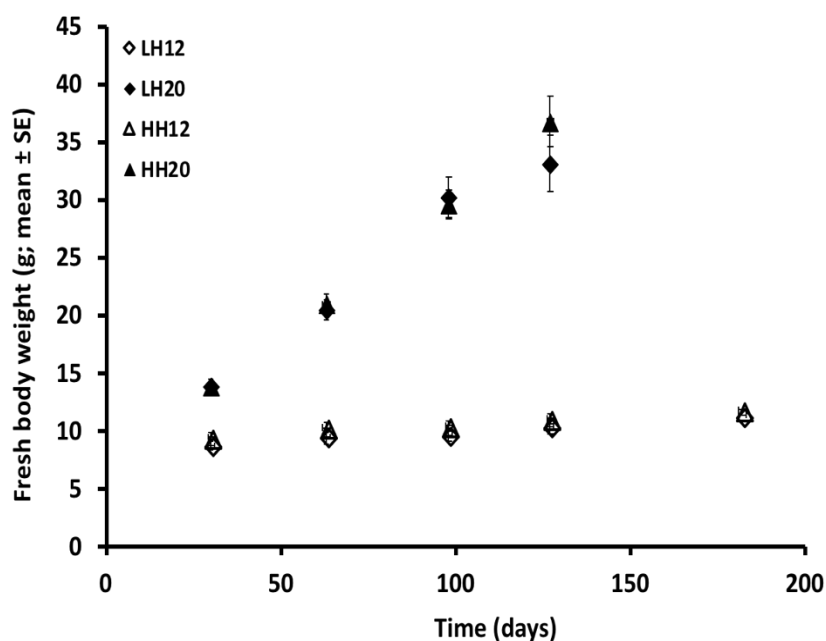

**Figure S2. Growth curve of the four experimental groups of fish (HH12, LH12, HH20, LH20)** tested and reared at 12°C or 20°C and fed the rich HUFA diet (HH) or the depleted HUFA diet (LH). The sample size was n = 34 (HH20), n = 20 (LH20), n = 37 (HH12) and n = 9 (LH12).

**Table S1. Transcriptome assembly statistics.** Assembly statistics based on the longest isoform per gene. The terminology corresponds to assembly with Trinity. BUSCO codes indicate the percentage of widely expressed genes that were recovered completely (C) (for single-copy (S) and duplicated (D) genes), that were only partially recovered (F for “Fragmented”), or that were missing (M). The total number of orthologous groups of genes (n) that was searched in BUSCO is also indicated.

|                                                      |                                                 |
|------------------------------------------------------|-------------------------------------------------|
| Raw reads                                            | 661,022,788                                     |
| Total assembled bases                                | 123,209,874                                     |
| Proportion of reads mapping back on the assembly (%) | 92.1                                            |
| Number of transcripts                                | 328,877                                         |
| Number of genes                                      | 189,77                                          |
| Median contig length (bp)                            | 349                                             |
| Average contig length (bp)                           | 649                                             |
| Contig N50 (in bp, based on the longest isoform)     | 1474                                            |
| BUSCO Eukaryota                                      | C:95.7%[S:53.5%,D:42.2%],F:3.0%,M:1.3%,n:303    |
| BUSCO Metazoa                                        | C:95.0%[S:51.4%,D:43.6%],F:2.4%,M:2.6%,n:978    |
| BUSCO Actinopterygii                                 | C:74.4%[S:40.9%,D:33.5%],F:10.1%,M:15.5%,n:4584 |

**Table S2. Summary table for GO terms summarised by REVIGO.** Log<sub>10</sub> FDR refers to the GO enrichment test performed by Goseq. Other headers are defined in Supek et al (2011).

[Click here to Download Table S2](#)

**Table S3. Results of the GO enrichment analysis performed by Goseq within the Trinity pipeline (see methods).** The four parts of the tables correspond to the four treatment comparisons conducted ( 12 s. 20 L 12 s. L 20 12 s. L 20 L 12 s. 20). Go terms are defined by the fields category term ( biological process cellular component F for Molecular Function) and ontology (GO term description). numDEIn at and numIn at provide the number of transcript detected within each GO term and whether they were detected as being differentially expressed or not respectively. gene ids provides the list of transcripts detected as differentially expressed. Significance of the enrichment tests are provided in the outer represented p value and under represented p value with their associated False Discovery Rate value ( outer represented FDR ).

[Click here to Download Table S3](#)

**Table S4 List of the unique 33 differentially-expressed transcripts** from the enriched GO Terms involved in calcium-mediated processes, specific to the HH12-LH20 comparison (compared to HH12-HH20: Fig. 7 and Table 2). These GO terms are linked to the combined effect of elevated temperature and lowered concentration of HUFA in the diet and are involved in the following five biological processes: regulation of voltage-gated calcium channel activity (GO:1901385, 11 differentially-expressed transcripts), positive regulation of calcium-transporting ATPase activity (GO:1901896, 7 differentially-expressed transcripts), calcium ion trans-membrane transport via high voltage-gated calcium channel (GO:0061577, 4 differentially-expressed transcripts), regulation of cardiac muscle contraction by regulation of the release of sequestered calcium ion (GO:0010881, 16 differentially-expressed transcripts), and regulation of release of sequestered calcium ion into cytosol by sarcoplasmic reticulum (GO:0010880, 21 differentially-expressed transcripts). There are 59 differentially-expressed transcripts, 26 of which are involved in more than one GO term; we removed duplicates as to presenting the differentially-expression levels are Trinotate annotation results for the 33 transcripts involved in the set of five GO terms.

[Click here to Download Table S4](#)
